# Supplementary material for: Isoflavones and Isoflavone Glycosides: Structural-Electronic Properties and Antioxidant Relations—A Case of DFT Study
Source: Hindawi journal article supplement (doi:10.1155/2019/4360175), 2019-06-24
Supplement: f1 [file 4360175.f1.docx]

| **Compound 1**  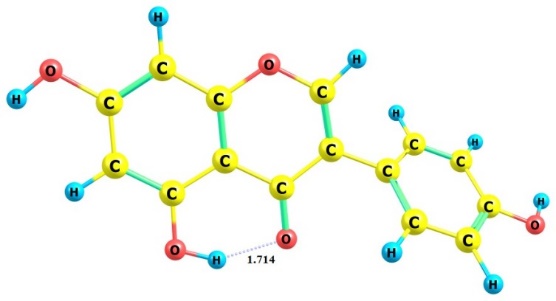 | **Compound 2**  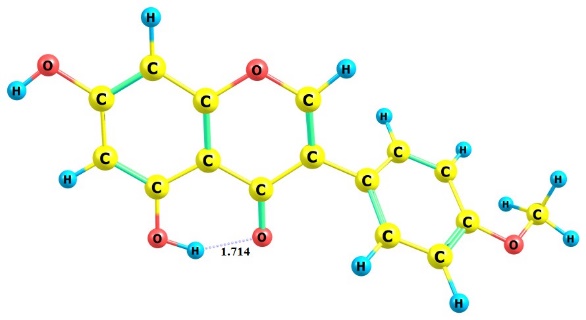 |
| --- | --- |
| **Compound 3**  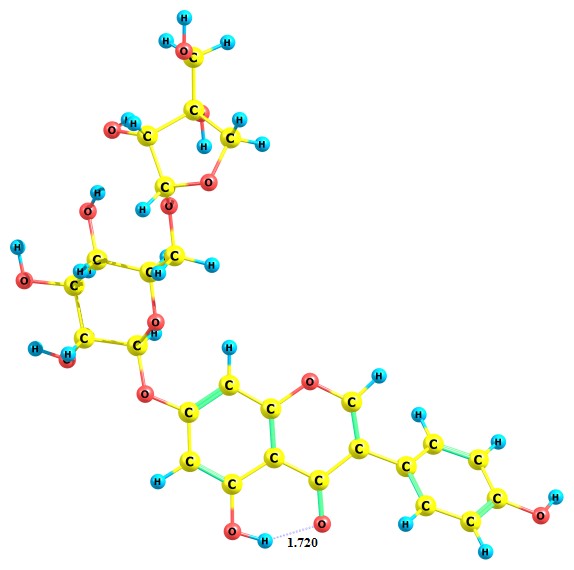 | **Compound 4**  **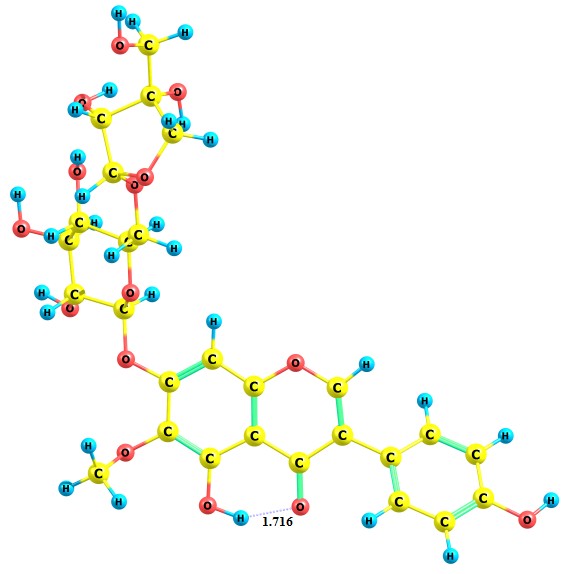** |

FIGURE S1 The state forms of studied structures in MeOH medium

TABLE S1 The collective energies depended on torsional angles θ2 (C2-C3-C1'-C2')

| Degree | Compound **1** | ΔE (kcal/mol) | Compound **2** | ΔE (kcal/mol) | Compound **3** | ΔE (kcal/mol) | Compound **4** | ΔE (kcal/mol) |
| --- | --- | --- | --- | --- | --- | --- | --- | --- |
| 0o | −598602.73 | 5.41 | −623272.97 | 4.02 | −1293390.88 | 4.00 | −1365263.44 | 4.03 |
| 15o | −598604.02 | 4.12 | −623274.40 | 2.58 | −1293392.28 | 2.60 | −1365264.85 | 2.62 |
| 30o | −598605.91 | 2.23 | −623276.40 | 0.59 | −1293394.28 | 0.60 | −1365266.87 | 0.60 |
| 42o | −598608.14 | 0.00 | −623276.98 | 0.00 | −1293394.88 | 0.00 | −1365267.47 | 0.00 |
| 60o | −598605.79 | 2.35 | −623276.25 | 0.73 | −1293394.16 | 0.73 | −1365266.76 | 0.71 |
| 75o | −598604.96 | 3.18 | −623275.29 | 1.69 | −1293393.20 | 1.69 | −1365265.82 | 1.65 |
| 90o | −598604.59 | 3.55 | −623274.79 | 2.19 | −1293392.74 | 2.15 | −1365265.36 | 2.11 |
| 105o | −598604.89 | 3.24 | −623275.06 | 1.92 | −1293393.04 | 1.84 | −1365265.67 | 1.80 |
| 120o | −598605.63 | 2.50 | −623275.89 | 1.09 | −1293393.90 | 0.98 | −1365266.53 | 0.94 |
| 135o | −598606.16 | 1.98 | −623276.58 | 0.40 | −1293394.59 | 0.29 | −1365267.21 | 0.26 |
| 150o | −598605.62 | 2.52 | −623276.15 | 0.83 | −1293394.17 | 0.71 | −1365266.77 | 0.70 |
| 165o | −598603.99 | 4.15 | −623274.37 | 2.61 | −1293392.38 | 2.50 | −1365266.15 | 1.32 |
| 180o | −598603.20 | 4.94 | −623273.12 | 3.86 | −1293391.11 | 3.77 | −1365263.66 | 3.81 |
| 195o | −598603.99 | 4.15 | −623274.37 | 2.61 | −1293392.38 | 2.50 | −1365266.15 | 1.32 |
| 210o | −598605.62 | 2.52 | −623276.15 | 0.83 | −1293394.17 | 0.71 | −1365266.77 | 0.70 |
| 225o | −598606.16 | 1.98 | −623276.58 | 0.40 | −1293394.59 | 0.29 | −1365267.21 | 0.26 |
| 240o | −598605.63 | 2.50 | −623275.89 | 1.09 | −1293393.90 | 0.98 | −1365266.53 | 0.94 |
| 255o | −598604.89 | 3.24 | −623275.06 | 1.92 | −1293393.04 | 1.84 | −1365265.67 | 1.80 |
| 270o | −598604.59 | 3.55 | −623274.79 | 2.19 | −1293392.74 | 2.15 | −1365265.36 | 2.11 |
| 285o | −598604.96 | 3.18 | −623275.29 | 1.69 | −1293393.20 | 1.69 | −1365265.82 | 1.65 |
| 300o | −598605.79 | 2.35 | −623276.25 | 0.73 | −1293394.16 | 0.73 | −1365266.76 | 0.71 |
| 318o | −598608.14 | 0.00 | −623276.98 | 0.00 | −1293394.88 | 0.00 | −1365267.47 | 0.00 |
| 330o | −598605.91 | 2.23 | −623276.40 | 0.59 | −1293394.28 | 0.60 | −1365266.87 | 0.60 |
| 345o | −598604.02 | 4.12 | −623274.40 | 2.58 | −1293392.28 | 2.60 | −1365264.85 | 2.62 |
| 360o | −598602.73 | 5.41 | −623272.97 | 4.02 | −1293390.88 | 4.00 | −1365263.44 | 4.03 |

TABLE S2Mulliken atomic charges at theoretical level B3LYP/ 6-311G(d) of studied compounds in gas and methanol mediums

| **No** | **1** | | **2** | | **3** | | **4** | |
| --- | --- | --- | --- | --- | --- | --- | --- | --- |
| Gas | MeOH | Gas | MeOH | Gas | MeOH | Gas | MeOH |
| Charge | Charge | Charge | Charge | Charge | Charge | Charge | Charge |
| 1 O | *−*0.288 | *−*0.288 | *−*0.253 | *−*0.256 | *−*0.289 | *−*0.284 | *−*0.289 | *−*0.284 |
| 2 C | 0.022 | 0.038 | 0.062 | 0.093 | 0.022 | 0.040 | 0.021 | 0.039 |
| 3 C | *−*0.192 | *−*0.192 | *−*0.178 | *−*0.173 | *−*0.192 | *−*0.191 | *−*0.192 | *−*0.191 |
| 4 C | 0.400 | 0.407 | 0.418 | 0.435 | 0.398 | 0.408 | 0.393 | 0.402 |
| 4 O | *−*0.420 | *−*0.452 | *−*0.395 | *−*0.430 | *−*0.418 | *−*0.449 | *−*0.419 | *−*0.449 |
| 4a C | *−*0.273 | *−*0.271 | *−*0.262 | *−*0.259 | *−*0.260 | *−*0.260 | *−*0.209 | *−*0.213 |
| 5 C | 0.313 | 0.308 | *−*0.178 | *−*0.173 | 0.321 | 0.315 | 0.260 | 0.264 |
| 5-OH | *−*0.551 | *−*0.574 | *−*0.496 | *−*0.540 | *−*0.552 | *−*0.576 | *−*0.552 | *−*0.570 |
| 5-OH | 0.414 | 0.412 | 0.414 | 0.412 | 0.412 | 0.412 | 0.414 | 0.413 |
| 6 C | *−*0.308 | *−*0.309 | *−*0.262 | *−*0.271 | *−*0.262 | *−*0.278 | 0.144 | 0.126 |
| 6-OCH3 |  |  |  |  |  |  | *−*0.340 | *−*0.372 |
| 7 C | 0.302 | 0.299 | 0.305 | 0.306 | 0.259 | 0.254 | 0.221 | 0.221 |
| 7-OH | *−*0.550 | *−*0.571 | *−*0.550 | *−*0.571 |  |  |  |  |
| 7-OC |  |  |  |  | *−*0.333 | *−*0.350 | *−*0.316 | *−*0.341 |
| 8 C | *−*0.270 | *−*0.284 | *−*0.203 | *−*0.221 | *−*0.311 | *−*0.313 | *−*0.302 | *−*0.302 |
| 8a C | 0.260 | 0.263 | 0.254 | 0.266 | 0.263 | 0.267 | 0.260 | 0.265 |
| 1' C | 0.020 | *−*0.001 | 0.038 | 0.033 | 0.019 | *−*0.001 | 0.019 | *−*0.001 |
| 2' C | *−*0.206 | *−*0.213 | *−*0.175 | *−*0.163 | *−*0.206 | *−*0.213 | *−*0.206 | *−*0.213 |
| 3' C | *−*0.270 | *−*0.278 | *−*0.247 | *−*0.242 | *−*0.270 | *−*0.278 | *−*0.270 | *−*0.278 |
| 4' C | 0.278 | 0.275 | 0.292 | 0.306 | 0.278 | 0.275 | 0.278 | 0.275 |
| 4' O | *−*0.556 | *−*0.584 | *−*0.275 | *−*0.289 | *−*0.557 | *−*0.584 | *−*0.557 | *−*0.584 |
| 5' C | *−*0.225 | *−*0.247 | *−*0.197 | *−*0.202 | *−*0.226 | *−*0.247 | *−*0.226 | *−*0.247 |
| 6' C | *−*0.165 | *−*0.187 | *−*0.142 | *−*0.148 | *−*0.165 | *−*0.188 | *−*0.165 | *−*0.187 |
| 1'' C |  |  |  |  | 0.126 | 0.120 | 0.121 | 0.119 |
| 1'' O |  |  |  |  | *−*0.374 | *−*0.385 | *−*0.376 | *−*0.386 |
| 2'' C |  |  |  |  | 0.041 | 0.038 | 0.044 | 0.040 |
| 2'' O |  |  |  |  | *−*0.597 | *−*0.611 | *−*0.575 | *−*0.611 |
| 3'' C |  |  |  |  | *−*0.053 | *−*0.059 | *−*0.053 | *−*0.060 |
| 3'' O |  |  |  |  | *−*0.606 | *−*0.614 | *−*0.597 | *−*0.614 |
| 4'' C |  |  |  |  | 0.008 | 0.016 | 0.007 | 0.014 |
| 4'' O |  |  |  |  | *−*0.421 | *−*0.621 | *−*0.606 | *−*0.622 |
| 5'' C |  |  |  |  | *−*0.061 | *−*0.072 | *−*0.059 | *−*0.067 |
| 6'' C |  |  |  |  | *−*0.204 | *−*0.203 | *−*0.205 | *−*0.206 |
| 6'' O |  |  |  |  | *−*0.421 | *−*0.424 | *−*0.420 | *−*0.421 |
| 1''' C |  |  |  |  | 0.165 | 0.162 | 0.162 | 0.158 |
| 1''' O |  |  |  |  | *−*0.347 | *−*0.372 | *−*0.347 | *−*0.371 |
| 2''' C |  |  |  |  | *−*0.006 | *−*0.001 | *−*0.004 | 0.000 |
| 2''' O |  |  |  |  | *−*0.584 | *−*0.603 | *−*0.585 | *−*0.605 |
| 3''' C |  |  |  |  | *−*0.046 | *−*0.040 | *−*0.045 | *−*0.039 |
| 3''' O |  |  |  |  | *−*0.606 | *−*0.614 | *−*0.597 | *−*0.614 |
| 4''' C |  |  |  |  | *−*0.155 | *−*0.158 | *−*0.156 | *−*0.159 |
| 5''' C |  |  |  |  | *−*0.145 | *−*0.140 | *−*0.145 | *−*0.141 |
| 5''' O |  |  |  |  | *−*0.421 | *−*0.621 | *−*0.606 | *−*0.622 |

TABLE S3 Condensed Fukui indices at B3LYP/6-311G(d) of studied compounds in gas medium

| **No** | **1** | | | **2** | | | **3** | | | **4** | | |
| --- | --- | --- | --- | --- | --- | --- | --- | --- | --- | --- | --- | --- |
| *f*+ | *f−* | *f*o | *f*+ | *f−* | *f*o | *f*+ | *f−* | *f*o | *f*+ | *f−* | *f*o |
| 1 O | *−*0.049 | *−*0.055 | *−*0.052 | *−*0.011 | *−*0.091 | *−*0.051 | *−*0.049 | *−*0.057 | *−*0.053 | *−*0.042 | *−*0.059 | *−*0.050 |
| 2 C | *−*0.045 | *−*0.121 | *−*0.038 | *−*0.005 | *−*0.203 | *−*0.104 | *−*0.037 | *−*0.118 | *−*0.040 | *−*0.006 | *−*0.158 | *−*0.082 |
| 3 C | *−*0.031 | 0.067 | 0.018 | *−*0.016 | 0.053 | 0.019 | *−*0.032 | 0.068 | 0.018 | *−*0.025 | 0.070 | 0.023 |
| 4 C | *−*0.023 | *−*0.061 | *−*0.042 | *−*0.003 | *−*0.078 | *−*0.041 | *−*0.023 | *−*0.063 | *−*0.043 | *−*0.041 | *−*0.066 | *−*0.053 |
| 4 O | *−*0.013 | *−*0.139 | *−*0.076 | 0.013 | *−*0.163 | *−*0.075 | *−*0.011 | *−*0.139 | *−*0.075 | *−*0.015 | *−*0.141 | *−*0.078 |
| 4a C | *−*0.014 | 0.014 | 0.000 | *−*0.004 | 0.003 | *−*0.001 | *−*0.009 | 0.016 | 0.003 | 0.052 | 0.015 | 0.033 |
| 5 C | *−*0.018 | *−*0.026 | *−*0.022 | *−*0.016 | 0.053 | 0.019 | *−*0.020 | *−*0.025 | *−*0.022 | *−*0.030 | *−*0.021 | *−*0.025 |
| 5-OH | *−*0.054 | *−*0.042 | *−*0.048 | 0.006 | *−*0.096 | *−*0.045 | *−*0.059 | *−*0.038 | *−*0.048 | *−*0.045 | *−*0.038 | *−*0.041 |
| 6 C | *−*0.043 | *−*0.034 | *−*0.038 | 0.006 | *−*0.079 | *−*0.037 | *−*0.035 | *−*0.022 | *−*0.029 | *−*0.098 | *−*0.022 | *−*0.060 |
| 6-OCH3 |  |  |  |  |  |  |  |  |  | *−*0.083 | *−*0.015 | *−*0.049 |
| 7 C | *−*0.003 | *−*0.012 | *−*0.007 | 0.000 | *−*0.014 | *−*0.007 | *−*0.018 | *−*0.030 | *−*0.024 | *−*0.011 | *−*0.034 | *−*0.023 |
| 7-OH | *−*0.037 | *−*0.040 | *−*0.039 | *−*0.037 | *−*0.040 | *−*0.039 |  |  |  |  |  |  |
| 7-OC |  |  |  |  |  |  | *−*0.025 | *−*0.021 | *−*0.023 | *−*0.018 | *−*0.020 | *−*0.019 |
| 8 C | *−*0.056 | *−*0.043 | *−*0.049 | 0.016 | *−*0.110 | *−*0.047 | *−*0.047 | *−*0.038 | *−*0.042 | *−*0.030 | *−*0.040 | *−*0.035 |
| 8a C | 0.022 | 0.012 | 0.017 | 0.018 | 0.018 | 0.018 | 0.013 | 0.012 | 0.013 | *−*0.034 | 0.014 | *−*0.010 |
| 1' C | *−*0.010 | *−*0.021 | *−*0.015 | 0.006 | *−*0.036 | *−*0.015 | *−*0.009 | *−*0.020 | *−*0.015 | *−*0.006 | *−*0.020 | *−*0.013 |
| 2' C | *−*0.022 | *−*0.024 | *−*0.023 | 0.001 | *−*0.056 | *−*0.028 | *−*0.020 | *−*0.022 | *−*0.021 | *−*0.009 | *−*0.020 | *−*0.015 |
| 3' C | *−*0.032 | *−*0.006 | *−*0.019 | 0.008 | *−*0.035 | *−*0.013 | *−*0.028 | *−*0.006 | *−*0.017 | *−*0.016 | *−*0.006 | *−*0.011 |
| 4' C | *−*0.034 | *−*0.019 | *−*0.026 | *−*0.009 | *−*0.047 | *−*0.028 | *−*0.031 | *−*0.017 | *−*0.024 | *−*0.017 | *−*0.016 | *−*0.017 |
| 4'-OH | *−*0.082 | *−*0.035 | *−*0.059 |  |  |  | *−*0.075 | *−*0.034 | *−*0.055 | *−*0.044 | *−*0.032 | *−*0.038 |
| 4'-OCH3 |  |  |  | *−*0.005 | *−*0.084 | *−*0.044 |  |  |  |  |  |  |
| 5' C | *−*0.033 | *−*0.009 | *−*0.021 | 0.002 | *−*0.042 | *−*0.020 | *−*0.030 | *−*0.009 | *−*0.019 | *−*0.015 | *−*0.009 | *−*0.012 |
| 6' C | *−*0.011 | *−*0.036 | *−*0.024 | 0.012 | *−*0.059 | *−*0.023 | *−*0.010 | *−*0.034 | *−*0.022 | *−*0.004 | *−*0.032 | *−*0.018 |
| 1'' C |  |  |  |  |  |  | 0.006 | 0.011 | 0.009 | *−*0.001 | 0.009 | 0.004 |
| 1'' O |  |  |  |  |  |  | 0.009 | 0.003 | 0.006 | 0.008 | 0.004 | 0.006 |
| 2'' C |  |  |  |  |  |  | 0.005 | 0.003 | 0.004 | 0.005 | 0.002 | 0.004 |
| 2'' O |  |  |  |  |  |  | *−*0.014 | 0.024 | 0.005 | 0.011 | 0.006 | 0.009 |
| 3'' C |  |  |  |  |  |  | *−*0.003 | *−*0.003 | *−*0.003 | 0.001 | *−*0.002 | *−*0.001 |
| 3'' O |  |  |  |  |  |  | *−*0.016 | 0.002 | *−*0.007 | *−*0.006 | *−*0.007 | *−*0.006 |
| 4'' C |  |  |  |  |  |  | 0.006 | 0.003 | 0.004 | 0.004 | 0.005 | 0.005 |
| 4'' O |  |  |  |  |  |  | 0.178 | *−*0.190 | *−*0.006 | *−*0.007 | *−*0.005 | *−*0.006 |
| 5'' C |  |  |  |  |  |  | *−*0.003 | 0.002 | *−*0.001 | 0.001 | *−*0.004 | *−*0.002 |
| 6'' C |  |  |  |  |  |  | 0.000 | *−*0.004 | *−*0.002 | *−*0.002 | *−*0.001 | *−*0.002 |
| 6'' O |  |  |  |  |  |  | *−*0.008 | *−*0.006 | *−*0.007 | *−*0.008 | *−*0.009 | *−*0.008 |
| 1''' C |  |  |  |  |  |  | 0.008 | 0.005 | 0.006 | 0.005 | 0.009 | 0.007 |
| 1''' O |  |  |  |  |  |  | *−*0.001 | *−*0.001 | *−*0.001 | *−*0.001 | *−*0.001 | *−*0.001 |
| 2''' C |  |  |  |  |  |  | *−*0.004 | *−*0.002 | *−*0.003 | *−*0.003 | *−*0.004 | *−*0.004 |
| 2''' O |  |  |  |  |  |  | 0.009 | 0.007 | 0.008 | 0.009 | 0.009 | 0.009 |
| 3''' C |  |  |  |  |  |  | 0.005 | 0.008 | 0.006 | 0.006 | 0.006 | 0.006 |
| 3''' O |  |  |  |  |  |  | *−*0.003 | *−*0.003 | *−*0.003 | *−*0.004 | *−*0.003 | *−*0.003 |
| 4''' C |  |  |  |  |  |  | 0.004 | 0.002 | 0.003 | 0.005 | 0.003 | 0.004 |
| 5''' C |  |  |  |  |  |  | *−*0.004 | *−*0.006 | *−*0.005 | *−*0.005 | *−*0.005 | *−*0.005 |
| 5''' O |  |  |  |  |  |  | 0.001 | 0.000 | 0.000 | 0.001 | 0.000 | 0.001 |
